# Supplementary material
Source: PubMed Central journal article supplement (PMC4211448)
Supplement: rspb20141539supp1.pdf [file rspb20141539supp1.pdf]

| <i>Ref.</i> | <i>Author(s)</i>       | <i>Year</i> | <i>Groups</i>                                       | <i>Conflict</i>                            | <i>Peace</i>                                                            | <i>Brutality</i>                | <i>Loot division</i>                                               | <i>Specifics</i>                                  |
|-------------|------------------------|-------------|-----------------------------------------------------|--------------------------------------------|-------------------------------------------------------------------------|---------------------------------|--------------------------------------------------------------------|---------------------------------------------------|
| [1]         | García & van den Bergh | 2011        | variable size, migration, fissioning                | between randomly matched groups            | conflict inevitable, ‘out-group love’ possible in pairwise interactions | total                           | equal (no explicit loot, though, victorious groups merely survive) | explicit group selection; assortment of altruists |
| [2]         | Bowles                 | 2009        | fixed size, no migration, fissioning                | between randomly matched groups            | conflict inevitable                                                     | total                           | equal (no explicit loot, though, victorious groups merely survive) | empirical calibration;                            |
| [3]         | Choi & Bowles          | 2007        | fixed size, random migration, fissioning and fusing | between randomly matched groups            | peaceful intergroup relations possible                                  | moderate                        | equal (no explicit loot, though, victorious groups merely survive) | quasi-sexual reproduction                         |
| [4]         | Smirnov et al.         | 2007        | variable size, no migration, fissioning             | between randomly matched groups            | conflict inevitable                                                     | total, but discussed separately | equal (no explicit loot, though, victorious groups merely survive) | differentiates ‘heroism’ from peace time altruism |
| [5]         | Bowles                 | 2006        | fixed size, no migration, fissioning                | between randomly matched groups            | conflict inevitable                                                     | total                           | equal (no explicit loot, though, victorious groups merely survive) | reproductive levelling, empirical calibration     |
| [6]         | Hammond & Axelrod      | 2006        | variable size, no migration between groups          | pairwise prisoner’s dilemmas only          | n.a.                                                                    | n.a.                            | n.a.                                                               | spatial model                                     |
| [7]         | Bowles & Gintis        | 2004        | variable size, no migration between groups          | pairwise modified prisoner’s dilemmas only | n.a.                                                                    | n.a.                            | n.a.                                                               | network model                                     |

| <i>Ref.</i> | <i>Author(s)</i> | <i>Year</i> | <i>Groups</i>                          | <i>Conflict</i>                 | <i>Peace</i>        | <i>Brutality</i> | <i>Loot division</i>                                               | <i>Specifics</i>                 |
|-------------|------------------|-------------|----------------------------------------|---------------------------------|---------------------|------------------|--------------------------------------------------------------------|----------------------------------|
| [8]         | Bowles et al.    | 2003        | almost constant size, random migration | between randomly matched groups | conflict inevitable | total            | equal (no explicit loot, though, victorious groups merely survive) | additional ‘social institutions’ |

**Table S1:** Overview of recent theoretical studies investigating co-evolutionary dynamics of in-group altruism and out-group spite (‘parochial altruism’). For a comprehensive listing of 183 relevant studies and reviews see Table S2.

## References

- [1] García, J. & van den Bergh, J. C. 2011 Evolution of parochial altruism by multilevel selection. *Evol. Hum. Behav.* 32, 277–287. (doi 10.1016/j.evolhumbehav.2010.07.007)
- [2] Bowles, S. 2009 Did Warfare Among Ancestral Hunter-Gatherers Affect the Evolution of Human Social Behaviors? *Science* 324, 1293–1298. (doi 10.1126/science.1168112)
- [3] Choi, J.-K. & Bowles, S. 2007 The Coevolution of Parochial Altruism and War. *Science* 318, 636–640. (doi 10.1126/science.1144237)
- [4] Smirnov, O., Arrow, H., Kennett, D. & Orbell, J. 2007 Ancestral War and the Evolutionary Origins of "Heroism". *J. Politi.* 69, 927–940. (doi 10.1111/j.1468-2508.2007.00599.x)
- [5] Bowles, S. 2006 Group Competition, Reproductive Leveling, and the Evolution of Human Altruism. *Science* 314, 1569–1572. (doi 10.1126/science.1134829)
- [6] Hammond, R. A. & Axelrod, R. 2006 The Evolution of Ethnocentrism. *J. Confl. Resolut.* 50, 926–936. (doi 10.1177/0022002706293470)
- [7] Bowles, S. & Gintis, H. 2004 Persistent parochialism: trust and exclusion in ethnic networks. *J. Econ. Behav. Organ.* 55, 1–23. (doi 10.1016/j.jebo.2003.06.005)
- [8] Bowles, S., Choi, J.-K. & Hopfensitz, A. 2003 The co-evolution of individual behaviors and social institutions. *J. Theor. Biol.* 223, 135–147. (doi 10.1016/S0022-5193(03)00060-2)
